# Supplementary material for: HIV Patients Developing Primary CNS Lymphoma Lack EBV-Specific CD4+ T Cell Function Irrespective of Absolute CD4+ T Cell Counts
Source: PubMed Central journal article supplement (PMC1831733; doi:10.1371/journal.pmed.0040096), 2007-03-27
Supplement: pmed.0040096.sg001.pdf [file pmed.0040096.sg001.pdf]

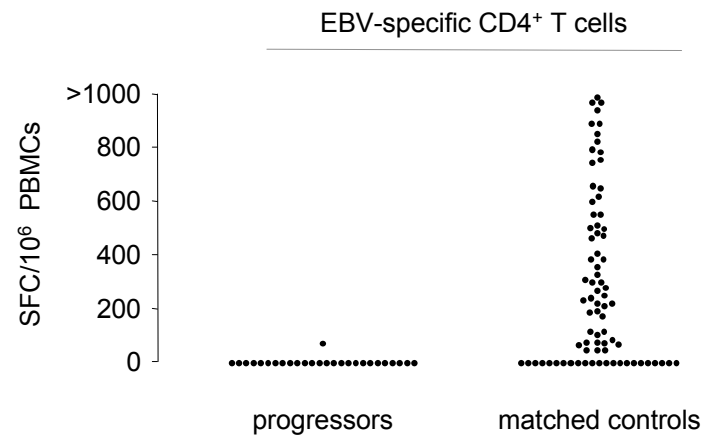

**Supplementary Figure 1**
